# Supplementary material
Source: Springer Nature journal article supplement (https://www.springermedizin.de/resource/supplementary/12958_2012_984_MOESM1_ESM.pdf/9566564)

|                                    | Day of HCG | D11   | D9    | D7    | D3   |
|------------------------------------|------------|-------|-------|-------|------|
| Group 1-B rFSH +low dose hCG ≥ 40y | 17.38      | 19.11 | 18.63 | 16.76 | 6.97 |
| Group 2-B rFSH ≥ 40y               | 19.96      | 19.29 | 19.62 | 19.32 | 7.42 |

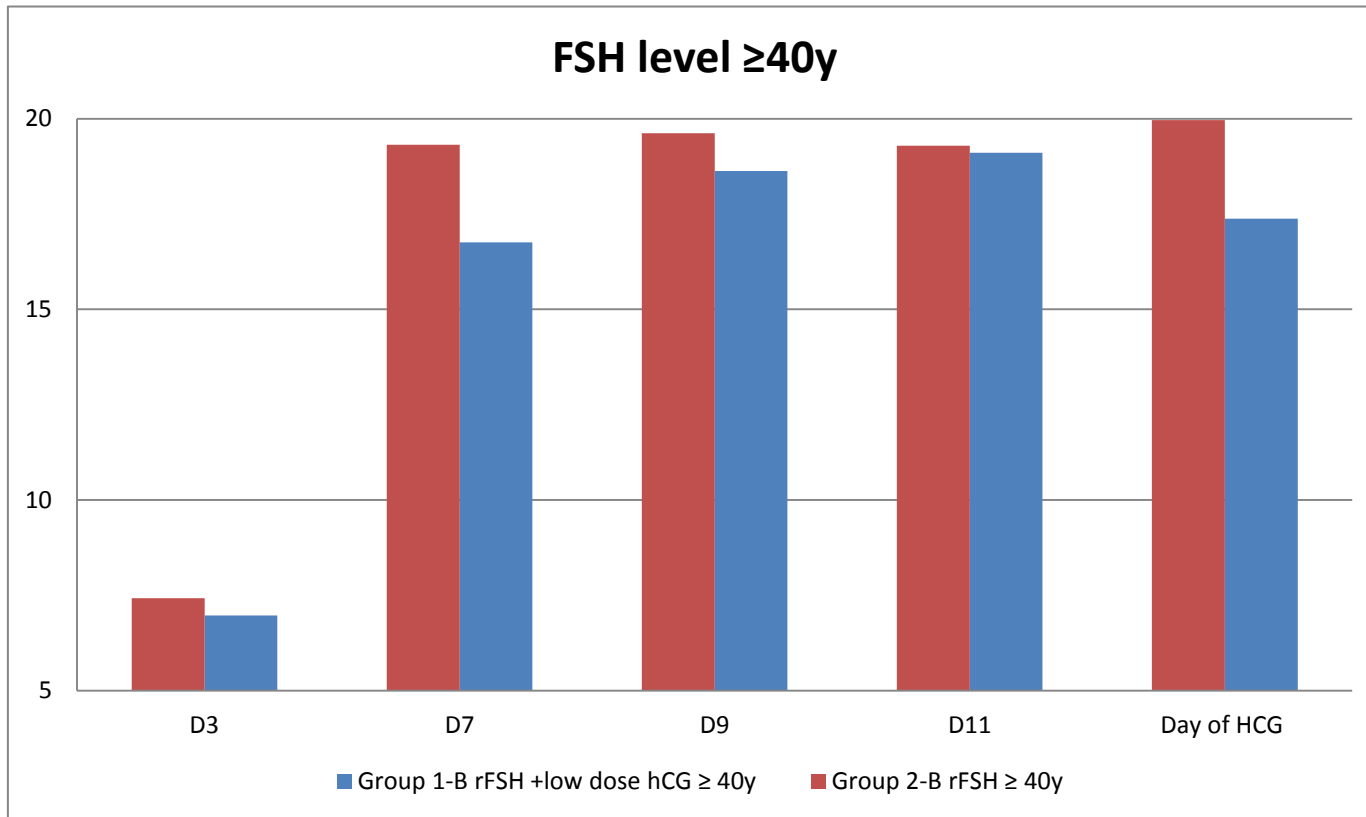

Supplement: MOESM1 [file 9566564]
